# Supplementary material for: Genomic and Phenotypic Characterization of a Wild Medaka Population: Towards the Establishment of an Isogenic Population Genetic Resource in Fish
Source: PubMed Central journal article supplement (PMC3962483; doi:10.1534/g3.113.008722), 2014-01-09
Supplement: supp_g3.113.008722_008722SI.pdf [file supp_g3.113.008722_008722SI.pdf]

## **Genomic and phenotypic characterization of a wild medaka population: Towards the establishment of an isogenic population genetic resource in fish**

Mikhail Spivakov<sup>1,6\*</sup>, Thomas O. Auer<sup>2,7\*</sup>, Ravindra Peravali<sup>3</sup>, Ian Dunham<sup>1</sup>, Dirk Dolle<sup>1,2</sup>, Asao Fujiyama<sup>4</sup>, Atsushi Toyoda<sup>4</sup>, Tomoyuki Aizu<sup>4</sup>, Yohei Minakuchi<sup>4</sup>, Felix Loosli<sup>3§</sup>, Kiyoshi Naruse<sup>5§</sup>, Ewan Birney<sup>1§</sup>, Joachim Wittbrodt<sup>2§</sup>

<sup>1</sup>European Bioinformatics Institute (EMBL- EBI), Wellcome Trust Genome Campus, Hinxton, Cambridgeshire, UK

<sup>2</sup>Centre for Organismal Studies, Heidelberg University, Germany

<sup>3</sup>Karlsruhe Institute of Technology, KIT, Karlsruhe, Germany

<sup>4</sup>Comparative Genomics Laboratory, Center for Information Biology, National Institute of Genetics, Shizuoka, Japan

<sup>5</sup>National Institute for Basic Biology, NIBB, Laboratory of Bioresources, Okazaki, Japan

<sup>6</sup>Present address: Babraham Institute, Cambridge, UK

<sup>7</sup>Present address: Neuronal Circuit Development Group, Unité de Génétique et Biologie du Développement, U934 / UMR3215, Institut Curie, Paris, France

\*These authors contributed equally to this work

§Corresponding authors

Email addresses:

MS: [Mikhail.Spivakov@babraham.ac.uk](mailto:Mikhail.Spivakov@babraham.ac.uk), TOA: [thomas.auer@curie.fr](mailto:thomas.auer@curie.fr), RP: [ravindra.peravali@kit.edu](mailto:ravindra.peravali@kit.edu),

ID: [dunham@ebi.ac.uk](mailto:dunham@ebi.ac.uk), DD: [ddolle@ebi.ac.uk](mailto:ddolle@ebi.ac.uk), AF: [afujiyam@gmail.com](mailto:afujiyam@gmail.com), AT: [atoyoda@nig.ac.jp](mailto:atoyoda@nig.ac.jp),

TA : [toaizu@nig.ac.jp](mailto:toaizu@nig.ac.jp), YM: [yminakuc@nig.ac.jp](mailto:yminakuc@nig.ac.jp), FL: [felix.loosli@kit.edu](mailto:felix.loosli@kit.edu), KN: [naruse@nibb.ac.jp](mailto:naruse@nibb.ac.jp),

EB: [birney@ebi.ac.uk](mailto:birney@ebi.ac.uk), JW: [jochen.wittbrodt@cos.uni-heidelberg.de](mailto:jochen.wittbrodt@cos.uni-heidelberg.de).

**DOI: 10.1534/g3.113.008722**

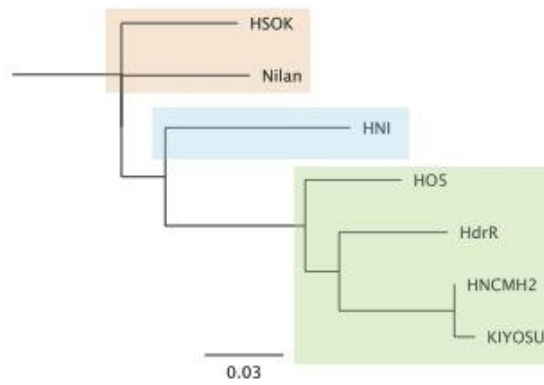

**Figure S1** Boxplots of measured morphometric features in the different inbred strains. A) Dorsal features. B) Lateral features. X-axis: Pixel values for each measurement. Grey shading: Southern inbred strains. Yellow shading: Northern inbred strains.

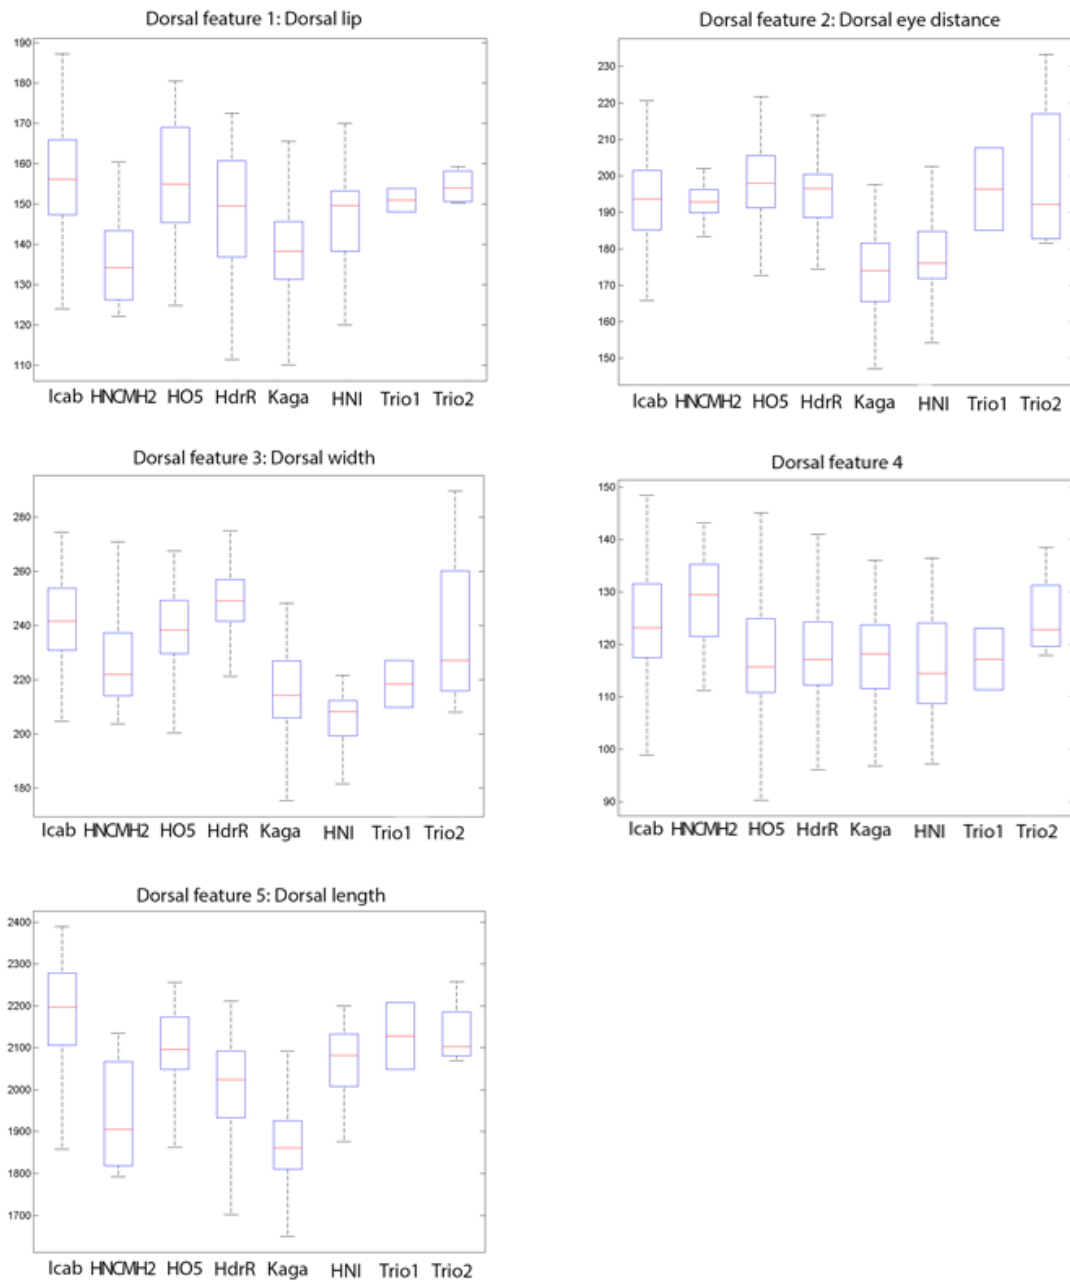

**Figure S2 Morphometric analysis of four inbred Southern lines, two inbred Northern lines and two trios from the Kiyosu wild population: Dorsal features.** The respective definitions of Features 1 to 5 are indicated in Figure 6A. A significant difference in all features between the six inbred lines is observed. The Kiyosu morphometric analysis is preliminary as the dataset has low sample numbers ( $N < 10$ ), whereas for the inbred lines  $N > 75$ . The differences between the Kiyosu datasets to the other datasets are therefore not statistically significant.

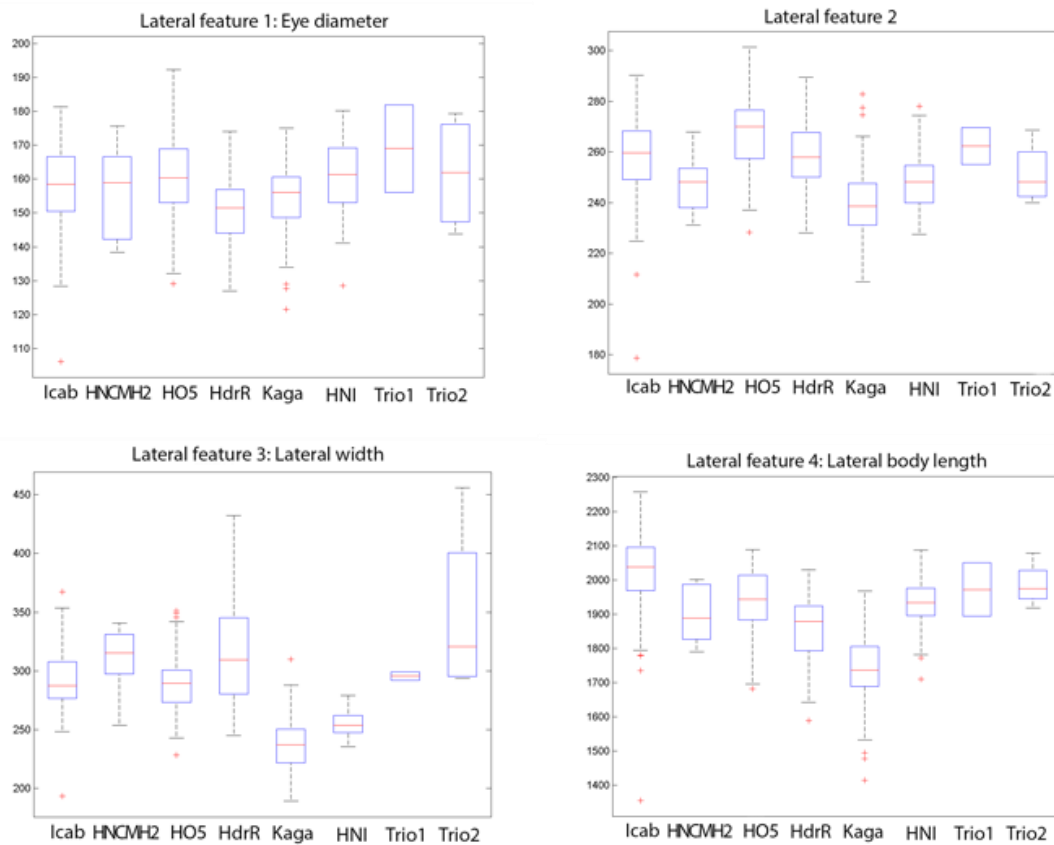

**Figure S3 Morphometric analysis of four inbred Southern lines, two inbred Northern lines and two trios from the Kiyosu wild population: Lateral features.** The respective definitions of Features 1 to 4 are indicated in Figure 6A. A significant difference in all features between the six inbred lines is observed. The Kiyosu morphometric analysis is preliminary as the dataset has low sample numbers ( $N < 10$ ), whereas for the inbred lines  $N > 75$ . The differences between the Kiyosu datasets to the other datasets are therefore not statistically significant.

**Table S1 Microsatellite markers used.** Oligonucleotide primer sequences, genomic locations and amplicon lengths for the microsatellite markers analyzed in the Kiyosu population sample.

| Linkage Group | Forward Primer                | Reverse Primer              | Genomic location       | Estimated amplicon size |
|---------------|-------------------------------|-----------------------------|------------------------|-------------------------|
| LG1           | AGCATTCTAGTTGCGTTT            | CTAGTTTTCCGGACAGTCA         | 1:24815630:24815850:1  | 202                     |
| LG2           | ATATCGACAGGTATGGATGG          | TCACATCTAGACCTGGAAGC        | 2:27141500:27141900:1  | 243                     |
| LG3           | TTATGATCCCATATTTGATT          | AGAGGGACACTGGGACAG          | 3:9396729:9397030:1    | 301                     |
| LG4           | GCTTTAAATTAGAGTTCATAACTGC     | GCTTTCATTAACATCAGGAAG       | 4:22460213:22460453:1  | 229                     |
| LG5           | GTTTTTGAAAGTTTTATTTTTGG       | TCAAAGCTAGTATTATGTAACACAG   | 5:8443091:8443291:1    | 181                     |
| LG6           | ATGTCCACCGACAAACAC            | AGTAGATGCCAGTGAGAGA         | 6:10841500:10841800:1  | 250                     |
| LG7           | AGCTTGCCCTTTTCTACAT           | GTTTGGAGACCCACTGTTT         | 7:19386200:19386460:1  | 188                     |
| LG8           | GCCAAAATGCCTTTTATTT           | TCCACATCAGAGCACATTC         | 8:21636852:21637100:1  | 209                     |
| LG9           | TTTTCATCTGCTCCTGATTT          | AGAGTTTCAGCAAGCAATGT        | 9:26192300:26192600:1  | 212                     |
| LG10          | CACCAGCTGAGTTTGAATG           | CAAGAGAAGGGAAGTCGTG         | 10:10113640:10113860:1 | 208                     |
| LG11          | ACAAGTATAGCTGCCCTCAG          | CCTGCTTCTTTTTGATTTT         | 11:4573925:4574200:1   | 205                     |
| LG12          | GCTGTTACAGCTGATGTC            | ATATTGGCACAAGCTGTTTT        | 12:15240800:15241200:1 | 202                     |
| LG13          | TTAGGCTCAATCTGTTATTTACAGATTAC | ATCCACAGGCTCAGCATCTT        | 13:10169674:10169904:1 | 231                     |
| LG14          | TTGCTGTCCTGTGTGTTTG           | GCTTGAAGGCAACAGCTTTG        | 14:7011652:7011851:1   | 200                     |
| LG15          | TGCCATAAATGAGGGAATTTAC        | TCAGTGTGAATCAGTTTCCTGT      | 15:7515398:7515597:1   | 200                     |
| LG16          | AATGACTTGGTGTCATATAATTTCCA    | AATTAATATCATCTTGGCAACATTATA | 16:7247259:7247458:1   | 200                     |
| LG17          | GGATTGCTGCTGAGTGAATTC         | CAATTTCCAGTTTCACTGACTGG     | 17:8333779:8333969:1   | 191                     |
| LG18          | AGCTTAGCAGACCGTTTTAGG         | CCTGCCGTGGATCTCAG           | 18:5214059:5214245:1   | 187                     |
| LG19          | GGTTTTTGCATCCTGCC             | GCTACCGAGTCCTTTGAATAAAG     | 19:13774098:13774297:1 | 200                     |
| LG20          | AAAAGCTGTATGAACAGATTTGC       | TGAGAGCCTGTTGCCTTC          | 20:7665987:7666186:1   | 200                     |
| LG21          | TAGCGGAGGCTGGCTG              | CAGAGCGCGCGGAGC             | 21:10273689:10273888:1 | 200                     |
| LG22          | AGAAAAGGAATGAGCCAGACC         | GTGTTTGTGCTGGAAATAGG        | 22:7909633:7909831:1   | 199                     |
| LG23          | GTGGAGGCTGCCGACGG             | CTCTGCTGTCTGCCTGCC          | 23:8615246:8615443:1   | 198                     |
| LG24          | AGTTTTTGGCTACATTCATAGTCAG     | GGAGAGGGTTTCTAGGGA          | 24:9528803:9529032:1   | 230                     |

**Table S2 Microsatellite alleles detected in wild Kiyosu Population.** Microsatellite alleles were tested in 109 fish from the wild Kiyosu Population. PCR amplification failed in 4 fish (samples 1, 5, 6, 7) giving allele results for 105 fish. For each microsatellite assay labeled as described in Supplementary Table 1, the two alleles identified in each assayed Kiyosu individual are listed.

| Sample | D-loop Sequencing |     |     |     |     |      |      |      |      |      |      |      |      |      |      |      |      |      |      |
|--------|-------------------|-----|-----|-----|-----|------|------|------|------|------|------|------|------|------|------|------|------|------|------|
|        |                   | LG3 | LG3 | LG6 | LG6 | LG13 | LG13 | LG14 | LG14 | LG16 | LG16 | LG17 | LG17 | LG18 | LG18 | LG22 | LG22 | LG24 | LG24 |
| 1      | C                 | -   | -   | -   | -   | -    | -    | -    | -    | -    | -    | -    | -    | -    | -    | -    | -    | -    | -    |
| 2      | G                 | L   | M   | C   | H   | A    | A    | A    | A    | A    | A    | C    | C    | B    | B    | K    | K    | A    | B    |
| 3      | H                 | E   | E   | F   | I   | D    | A    | F    | K    | A    | A    | C    | C    | B    | B    | O    | O    | A    | E    |
| 4      | H                 | U   | U   | -   | -   | G    | A    | A    | B    | A    | A    | C    | F    | B    | B    | A    | A    | B    | D    |
| 5      | A                 | -   | -   | -   | -   | -    | -    | -    | -    | -    | -    | -    | -    | -    | -    | -    | -    | -    | -    |
| 6      | H                 | -   | -   | -   | -   | -    | -    | -    | -    | -    | -    | -    | -    | -    | -    | -    | -    | -    | -    |
| 7      | H                 | -   | -   | -   | -   | -    | -    | -    | -    | -    | -    | -    | -    | -    | -    | -    | -    | -    | -    |
| 8      | C                 | Q   | S   | A   | E   | G    | G    | A    | A    | A    | A    | A    | A    | A    | B    | E    | H    | B    | C    |
| 9      | H                 | N   | N   | -   | -   | -    | -    | -    | -    | A    | A    | A    | A    | -    | -    | -    | -    | -    | -    |
| 10     | C                 | B   | O   | -   | -   | -    | -    | -    | -    | A    | B    | F    | F    | -    | -    | -    | -    | -    | -    |
| 11     | H                 | M   | Q   | -   | -   | -    | -    | -    | -    | A    | A    | B    | C    | -    | -    | -    | -    | -    | -    |
| 12     | C                 | E   | L   | -   | -   | -    | -    | -    | -    | A    | A    | C    | G    | -    | -    | -    | -    | -    | -    |
| 13     | H                 | F   | M   | A   | E   | A    | F    | A    | N    | A    | A    | B    | D    | B    | B    | F    | N    | A    | C    |
| 14     | G                 | B   | L   | A   | G   | A    | A    | A    | K    | A    | A    | A    | D    | B    | B    | D    | H    | A    | A    |
| 15     | A                 | C   | J   | E   | F   | D    | E    | A    | G    | A    | A    | C    | F    | A    | B    | B    | E    | A    | D    |
| 16     | H                 | H   | M   | A   | A   | J    | K    | D    | L    | A    | A    | B    | C    | B    | B    | E    | I    | C    | K    |
| 17     | H                 | M   | M   | D   | E   | A    | A    | B    | C    | A    | A    | C    | E    | B    | B    | E    | E    | B    | C    |
| 18     | E                 | A   | L   | A   | E   | A    | D    | B    | B    | A    | A    | B    | E    | B    | B    | J    | J    | A    | D    |
| 19     | D                 | E   | I   | F   | G   | A    | D    | O    | P    | A    | A    | C    | D    | B    | B    | B    | C    | B    | D    |
| 20     | H                 | F   | K   | A   | E   | A    | I    | A    | M    | A    | A    | C    | E    | B    | C    | E    | E    | C    | E    |
| 21     | H                 | Q   | Q   | A   | A   | A    | B    | G    | G    | A    | A    | C    | F    | A    | B    | A    | J    | D    | G    |
| 22     | C                 | K   | S   | E   | I   | D    | I    | A    | J    | A    | A    | D    | F    | A    | B    | E    | J    | D    | D    |
| 23     | C                 | M   | M   | A   | I   | D    | H    | A    | G    | A    | A    | A    | A    | B    | B    | G    | G    | C    | E    |
| 24     | H                 | K   | N   | D   | I   | A    | C    | C    | D    | A    | A    | B    | C    | B    | B    | B    | C    | A    | C    |
| 25     | H                 | A   | J   | E   | F   | A    | A    | C    | H    | A    | A    | D    | F    | B    | B    | C    | H    | A    | C    |
| 26     | C                 | U   | U   | D   | E   | A    | E    | A    | A    | A    | A    | A    | D    | B    | B    | C    | E    | C    | E    |
| 27     | -                 | G   | I   | E   | G   | A    | C    | B    | C    | A    | A    | A    | E    | B    | B    | F    | M    | A    | L    |
| 28     | C                 | H   | O   | B   | E   | D    | F    | B    | B    | A    | A    | C    | D    | B    | B    | A    | A    | A    | C    |

|    |   |   |   |   |   |   |   |   |   |   |   |   |   |   |   |   |   |   |   |
|----|---|---|---|---|---|---|---|---|---|---|---|---|---|---|---|---|---|---|---|
| 29 | C | F | I | D | E | A | A | - | - | A | A | B | E | B | B | E | L | - | - |
| 30 | - | A | I | A | E | D | D | A | A | A | A | A | D | B | B | C | C | A | D |
| 31 | G | K | R | A | H | - | - | - | - | A | A | B | D | B | B | G | I | - | - |
| 32 | C | B | P | E | G | A | A | A | C | A | A | B | C | B | C | A | E | A | B |
| 33 | - | I | K | A | H | B | B | D | D | A | A | C | E | A | B | C | J | F | F |
| 34 | G | E | E | A | G | A | E | I | O | A | A | B | C | A | B | I | I | B | B |
| 35 | B | D | L | A | G | D | D | B | I | A | A | A | D | B | B | A | E | B | C |
| 36 | G | P | P | B | F | A | B | B | C | A | A | C | D | B | B | C | G | A | D |
| 37 | C | K | Q | E | G | B | D | A | M | A | A | B | D | A | B | C | N | A | E |
| 38 | C | D | G | A | G | A | C | B | G | A | A | C | D | B | B | E | E | A | A |
| 39 | C | E | J | A | C | D | F | C | J | A | A | A | F | A | B | C | H | C | E |
| 40 | H | L | O | A | F | C | D | D | F | A | A | B | D | A | B | C | E | A | C |
| 41 | G | E | O | A | A | E | H | A | B | A | A | B | D | B | B | K | K | A | E |
| 42 | C | D | J | E | G | A | C | B | M | A | B | C | H | A | B | E | M | B | C |
| 43 | H | R | R | C | G | B | B | I | O | C | D | C | C | A | B | E | E | F | J |
| 44 | H | C | P | F | I | A | H | D | K | A | A | D | D | A | B | E | P | E | E |
| 45 | H | - | - | F | G | B | B | B | B | A | B | A | G | A | B | C | E | F | F |
| 46 | C | A | S | A | I | A | C | A | A | A | A | A | G | B | B | N | N | C | C |
| 47 | C | L | M | E | G | C | G | C | H | A | A | A | E | B | B | A | E | C | C |
| 48 | H | E | R | A | E | A | D | B | F | A | A | C | D | B | B | C | G | A | D |
| 49 | H | I | L | - | - | - | - | - | - | A | A | B | C | - | - | - | - | - | - |
| 50 | C | - | - | - | - | - | - | - | - | A | A | B | B | - | - | - | - | - | - |
| 51 | E | F | G | B | E | A | D | A | M | A | A | A | A | A | B | A | H | A | D |
| 52 | H | G | L | E | E | A | C | F | F | A | A | A | J | B | B | C | C | A | A |
| 53 | H | A | G | A | D | F | I | B | I | A | A | C | E | B | B | H | I | A | D |
| 54 | C | B | K | F | F | E | F | A | A | A | A | C | C | B | B | E | O | A | E |
| 55 | H | O | Q | A | E | A | D | F | I | A | A | C | D | B | B | E | O | A | C |
| 56 | H | E | Q | F | J | A | A | G | I | A | A | B | B | B | B | F | L | B | C |
| 57 | H | M | P | A | E | E | G | E | J | A | A | B | C | B | B | C | G | A | C |
| 58 | C | A | L | A | A | C | H | A | B | A | A | A | A | B | B | B | E | C | E |
| 59 | H | L | O | D | G | D | E | N | N | A | A | A | A | B | B | C | O | A | C |
| 60 | B | H | O | A | A | A | C | H | N | A | A | A | F | B | B | D | L | A | B |

|    |   |   |   |   |   |   |   |   |   |   |   |   |   |   |   |   |   |   |   |
|----|---|---|---|---|---|---|---|---|---|---|---|---|---|---|---|---|---|---|---|
| 61 | H | M | S | A | H | D | D | C | J | A | A | C | F | B | B | B | O | B | D |
| 62 | C | H | Q | G | I | B | B | M | M | A | A | A | A | B | B | B | J | F | I |
| 63 | D | K | S | A | F | A | D | K | M | A | A | B | B | B | B | E | E | A | G |
| 64 | H | C | D | A | D | B | F | D | N | A | A | B | C | B | B | B | N | B | C |
| 65 | H | F | K | A | A | B | C | A | C | A | A | A | A | B | B | A | A | C | D |
| 66 | H | E | H | A | E | A | A | M | N | A | A | A | D | B | B | C | L | A | C |
| 67 | H | E | Q | A | E | A | D | A | L | A | A | B | B | A | B | B | B | A | C |
| 68 | H | K | O | D | E | A | A | A | I | A | A | E | E | B | B | E | I | E | E |
| 69 | H | E | F | E | G | A | C | A | B | A | A | B | B | B | B | N | P | B | F |
| 70 | C | P | S | A | G | C | D | B | K | A | A | B | B | B | B | D | J | B | C |
| 71 | H | K | N | E | G | C | D | A | B | A | A | A | J | B | B | G | L | C | D |
| 72 | C | E | M | C | G | C | D | G | N | A | A | A | F | B | B | - | - | A | C |
| 73 | G | K | P | G | G | D | H | C | O | A | A | A | A | B | B | B | E | A | B |
| 74 | H | D | K | A | A | A | D | B | B | A | A | C | F | B | B | C | M | A | B |
| 75 | D | E | H | E | G | A | C | A | C | A | A | B | B | B | B | C | K | C | C |
| 76 | C | A | L | A | F | A | C | A | C | A | A | C | E | B | B | B | C | B | D |
| 77 | C | N | Q | A | A | A | F | A | A | A | A | A | D | B | B | A | A | A | C |
| 78 | H | E | M | A | I | A | C | A | A | A | A | A | D | A | B | F | I | A | D |
| 79 | H | B | T | - | - | D | H | I | J | A | A | C | C | - | - | - | - | B | C |
| 80 | H | A | E | G | H | A | C | F | J | A | A | C | D | B | B | C | N | B | B |
| 81 | D | F | L | A | J | C | C | E | H | A | A | B | C | B | B | B | E | A | C |
| 82 | H | M | M | A | I | A | C | B | P | A | A | B | D | B | B | E | E | B | C |
| 83 | H | E | K | A | F | A | H | A | O | A | A | A | D | A | B | B | L | B | B |
| 84 | D | E | M | A | E | A | A | A | A | A | A | A | D | B | B | B | E | C | C |
| 85 | C | A | G | E | E | A | A | H | I | A | A | B | C | A | B | J | O | A | D |
| 86 | G | E | M | A | E | D | D | B | I | A | A | A | A | B | B | C | C | B | D |
| 87 | H | M | P | D | E | C | D | A | A | A | A | B | C | A | B | L | L | A | D |
| 88 | H | E | L | A | G | A | E | A | B | A | A | C | F | B | B | B | M | A | C |
| 89 | C | E | E | B | E | A | G | D | G | A | A | C | D | B | B | E | G | A | C |
| 90 | H | B | K | A | A | D | F | G | I | A | A | F | F | A | B | J | L | A | C |
| 91 | H | A | I | A | A | A | C | A | N | A | A | B | B | A | B | C | C | C | D |
| 92 | C | F | P | A | G | F | I | A | D | A | A | B | G | A | B | G | I | A | C |



|     |   |   |   |   |   |   |   |   |   |   |   |   |   |   |   |   |   |   |   |
|-----|---|---|---|---|---|---|---|---|---|---|---|---|---|---|---|---|---|---|---|
| 93  | H | I | N | F | J | A | H | A | G | A | A | C | I | A | B | C | C | A | A |
| 94  | G | E | K | E | H | - | - | - | - | A | A | B | I | A | B | - | - | - | - |
| 95  | H | G | O | E | E | A | B | A | A | A | A | A | A | B | B | C | C | D | D |
| 96  | H | F | P | A | C | A | E | I | G | A | A | A | A | A | B | K | L | B | D |
| 97  | H | A | M | C | F | B | D | A | C | A | A | A | I | B | B | G | H | C | D |
| 98  | D | F | L | E | E | D | D | A | M | A | A | A | A | B | B | B | C | A | C |
| 99  | H | G | I | E | I | A | A | G | H | A | A | A | F | B | D | K | K | A | B |
| 100 | H | B | P | A | G | A | C | A | I | A | A | B | C | B | B | B | E | A | D |
| 101 | H | E | E | A | C | D | D | A | I | A | A | A | A | A | B | C | D | A | D |
| 102 | F | E | G | E | H | A | D | B | F | A | A | A | F | A | B | E | G | D | E |
| 103 | C | I | T | A | E | C | E | D | J | A | A | B | E | B | C | C | K | A | C |
| 104 | H | D | S | A | F | F | H | A | A | A | A | B | B | A | B | E | K | C | D |
| 105 | H | L | M | C | E | C | D | D | F | A | A | C | D | B | B | C | C | D | E |
| 106 | C | F | O | A | G | A | D | I | O | A | A | C | D | B | B | G | G | B | C |
| 107 | H | N | O | G | G | A | I | B | C | A | A | B | C | A | B | J | L | A | C |
| 108 | H | E | K | A | E | A | C | H | L | A | A | A | A | A | B | C | E | A | E |
| 109 | H | E | I | A | I | A | C | D | D | A | A | B | C | A | B | E | N | A | A |

---

**Table S3 Introgression analysis.** Tests for introgression of the P3 strain into P1 or P2 strains that are more closely related with each other than to P1, using stickleback as the outgroup (O). D% is the introgression test statistic, on which the standard error (SE), 95% confidence intervals (CI) and Z-scores were estimated using block-wise jackknife ([Durand et al. 2011](#)).

| P1           | P2          | P3                                | O           | D%           | SE          | 95% CI     | Z-score     |
|--------------|-------------|-----------------------------------|-------------|--------------|-------------|------------|-------------|
| <b>Kaga</b>  | <b>Hni</b>  | <b>HdrR</b>                       | Stickleback | <b>3.6</b>   | <b>1.3</b>  | <b>2.5</b> | <b>2.77</b> |
| Kaga         | Hni         | Wild Southern                     | "           | 2.6          | 1           | 2          | 2.5         |
| Kaga         | Hni         | Wild Southern<br>(SNPs with HdrR) | "           | -4           | 3.6         | 7.1        | 1.1         |
| <b>Nilan</b> | <b>Hsok</b> | <b>HdrR</b>                       | "           | <b>-12.3</b> | <b>4.66</b> | <b>9.1</b> | <b>2.64</b> |
| Nilan        | Hsok        | Wild Southern                     | "           | -10.4        | 5.27        | 10.3       | 1.96        |
| Nilan        | Hsok        | Wild Southern<br>(SNPs with HdrR) | "           | 7.6          | 6.5         | 12.8       | 0.6         |
| Nilan        | Hsok        | Kaga                              | "           | -0.7         | 2.5         | 4.9        | 0.28        |

Tests for introgression of the P3 strain into P1 or P2 strains that are more closely related with each other than to P1, using stickleback as the outgroup (O). D% is the introgression test statistic, on which the standard error (SE), 95% confidence intervals (CI) and Z-scores were estimated using block-wise jackknife.

**Table S4 iHS analysis.** Numbers of SNPs showing evidence of recent positive selection in regions with different levels of evolutionary conservation versus those expected at random. Expected values, their standard deviations and p-values were estimated from permutation tests.

| Type                      | Observed | Expected | Standard deviation (+/- ) | Fold change | Direction of difference | P      |
|---------------------------|----------|----------|---------------------------|-------------|-------------------------|--------|
| Non-conserved             | 87       | 60       | 7                         | 1.45        | Enriched                | <0.005 |
| At least 1 other teleost  | 105      | 131      | 7                         | 0.80        | Depleted                | <0.005 |
| At least 2 other teleosts | 95       | 110      | 7                         | 0.86        | "                       | 0.014  |
| At least 3 other teleosts | 72       | 89       | 7                         | 0.81        | "                       | 0.008  |
| Four other teleosts       | 38       | 27       | 5                         | 1.41        | Enriched                | 0.032  |

Numbers of SNPs showing evidence of recent positive selection in regions with different levels of evolutionary conservation versus those expected at random. Expected values, their standard deviations and p-values were estimated from permutation tests.

**Table S5 Primers designed for SNP verification sequencing.** PCR amplification primers are given for the SNP resequencing amplicons. For the coding SNPs, the original reference sequence indicated a coding triplet, whereas a stop codon was indicated by our height throughput sequencing. The status column indicates whether PCR amplification and sequencing confirmed the new sequence.

**NONSENSE SNPs**

| Strain | Chromosome | Position | Reference triplet | Detected triplet | Reference amino acid | Forward primer                 | Reverse primer                |
|--------|------------|----------|-------------------|------------------|----------------------|--------------------------------|-------------------------------|
| HNI    | chr23      | 20491840 | TTA               | TAA              | L                    | TCAGTGGCTGTAAAAGGCTGTAGATTG    | ACCACACAGATGCGAAAAACACATCC    |
| HNI    | chr8       | 1955292  | CGA               | TGA              | R                    | ACCAGAATCCTTCTCCTCCACCTGC      | CAAGCTGTGTAAGTGGGCTGAGTC      |
| HNI    | chr7       | 1468063  | TGG               | TAG              | W                    | AGTGTCCCATTTTGCCTTCAACAGC      | CGGTTGCTTCTGCAAAGCCTATTCTCC   |
| HNI    | chr18      | 2964751  | AAG               | TAG              | K                    | CTTTGCGTAGAATCTGATGGGACAGC     | TGTATGCCTGCCTTTTCAATCAGCG     |
| HNI    | chr2       | 20573966 | CAG               | TAG              | Q                    | CCGAGGTAAATTCTTTTCTGGTCAGTGG   | GGGTTGTTTGTGCTTGGCTTCCCTG     |
| HNI    | chr14      | 15525786 | TAC               | TAA              | Y                    | ACAACGACGTGAATATTCTGGAGGGG     | AAGTCGCTTTTACTGCGCACCTGG      |
| Kaga   | chr3       | 2245314  | TCA               | TGA              | S                    | TCTTGCACTGGGGGAGGTGATGG        | AGTTCCTCGTCTGCAATTGGTTGGC     |
| Kaga   | chr5       | 14257733 | CAA               | TAA              | Q                    | TCAATTATTATCGTGGGATGTAAGTGGTGC | TGTGGATGGATGGAACAAGCTCAACG    |
| Kaga   | chr14      | 7969562  | CAA               | TAA              | Q                    | AGCTCAAGGTGGTGTAGGTTCCAGG      | CTCGTGGGTCTCCCCTTCTCTCATC     |
| Kaga   | chr13      | 5610005  | TCG               | TAG              | S                    | CGCCAGATCAAAGATAGGGGGAAAGC     | TATGACGTTCACTGAGAGAAGGGGC     |
| Nilan  | chr8       | 22537356 | CGA               | TGA              | R                    | CCACAGAGCCACAGGAGATGTGATG      | AGAATCCTAAAAGCAGCAGACGCCG     |
| Nilan  | chr22      | 1757977  | GGA               | TGA              | G                    | TCGTTTCTGCAGATCCTGAGGTGG       | GGGTCAGGGTTTTAGCCGTTTCTGC     |
| Nilan  | chr16      | 6784490  | TGT               | TGA              | C                    | TCACTTTTGCCTCTGTCTTTAGGTGG     | TGCTGACAGCTTAAACAAGGATCTGTTTG |
| Nilan  | chr7       | 4911752  | TGG               | TAG              | W                    | TCTGCTGTACGCAGCGGACTTTTTTC     | AACTTTAAGCTTTTCTGGCGCAGC      |
| Nilan  | chr18      | 17668284 | AAA               | TAA              | K                    | ACACACCTTTCTTGAATTCAGCCGC      | AACGAGAAGACAGAAGACGGTGAGGC    |
| Nilan  | chr15      | 11785459 | GAG               | TAG              | E                    | ACATTTCTGACTAATTTCAAGCAGGTC    | CGTAGTTGGACTTTATGGAAGCCAGG    |

**NON-CODING SNPs (Kaga)**

| Strain | Chromosome | Position | Reference base | Detected base | Forward primer              | Reverse primer             |
|--------|------------|----------|----------------|---------------|-----------------------------|----------------------------|
| Kaga   | chr3       | 8401434  | T              | G             | AGGTTTGTACCAGTGATTGTGACTGAG | GGTGCATTATGTAGCTGCTGTTCCG  |
| Kaga   | chr4       | 31533375 | G              | T             | AGCAGCCAGTGCCAAGAAAACAGAG   | TTTCAATGGCCCTTTAGGGGCTCCG  |
| Kaga   | chr6       | 15965403 | G              | C             | TGCACGATGTTGCAAAATATTACCCCC | CGTCTTGGTCACAGCGAACTCTAACG |

|      |       |          |   |   |                             |                           |
|------|-------|----------|---|---|-----------------------------|---------------------------|
| Kaga | chr7  | 27519929 | G | A | TGCACTCTTGCCATAAACAGTCATCC  | TGTCTGTCTGGAAGCAGCATAACCC |
| Kaga | chr19 | 19825516 | A | T | CCTGCACAAAACCCACACATACACG   | AGGCAGAGTTTGACGTGGATCAAGC |
| Kaga | chr22 | 5161675  | G | A | GACCTTTAACTGGGGCCCTGTGTG    | TCTCCTCCCCCTTTGTTGTGTGCTG |
| Kaga | chr20 | 9670880  | A | T | GCAAGCTGCCCTAACCAATGATCCG   | CTCACATGCCTAGCAGCAGTGACAG |
| Kaga | chr22 | 24304734 | T | C | TGGGGTTCTAGTGAAGGAAGGCTTGG  | GCCTCTTTAGCCGTCCTCCTGTTG  |
| Kaga | chr5  | 28448196 | A | T | CTGATGTGACACACTCCAAAAACAGGC | ACGAGCCTGTTGGGAGTCAAAAAGC |
| Kaga | chr17 | 2618509  | C | G | GCTGCTTCTAAGGTCAGTCCGTTTG   | GACAACATAAAGCAGCAAGCGCAGC |

#### RANDOM SNPs (HdrR)

| Strain | Chromosome | Position | Reference base | Detected base | Forward primer                | Reverse primer             |
|--------|------------|----------|----------------|---------------|-------------------------------|----------------------------|
| HdrR   | chr1       | 16324653 | C              | A             | CAAGGGAGGCCACCAATGAACCTGAG    | TTTTGATGTGGAGGAACAGTAGGCTG |
| HdrR   | chr1       | 33512684 | T              | G             | TGTTTGTGTCAGAGCGAAGCAGCAG     | GACCGTGAATGTAAGGGAGCCCG    |
| HdrR   | chr9       | 31027771 | T              | G             | GCACCAGGCTTGCCACAGTTAAGG      | AAGACATCCGTGTCCGTTCCAGTGC  |
| HdrR   | chr16      | 3550201  | C              | A             | AGCCGACGTGGCCTTTGTGTGGG       | TCTTCTGGTGGTTTCTACCTCTGGG  |
| HdrR   | chr1       | 27318612 | A              | G             | CAAGCAGGTTTTGCTTTCAACTCCGC    | ACCTGCCAAAAGTGAACCTAACGGC  |
| HdrR   | chr16      | 5495844  | A              | G             | GCAACCATGGCAGTTGCACCATAAAC    | TGAGCGCTCTTCTCTCATCCATGC   |
| HdrR   | chr1       | 23401471 | C              | T             | CCGATACGCTGGTTTCTACGGTCTG     | TGTCTGTGTTGAACTGTGTCTCCAGC |
| HdrR   | chr1       | 15819568 | A              | G             | AAAGAGTCAGATGGAAGAGCTGAAAGATG | TGATTGCGTGTACTCCTCCTCCAAG  |
| HdrR   | chr1       | 19723612 | C              | T             | ACATGGTACTCACACGCTCATTGGC     | CACAGAAGTACCGCTGAAGGTGCTG  |
| HdrR   | chr22      | 21769957 | T              | C             | GTGAGAGCGCTGGAGATGAGAGGAG     | CTGGAAAACACATTTACGCTGCGG   |
| HdrR   | chr8       | 2893859  | A              | G             | ACAAGTTGGGCATATCCACAGGACG     | GTTTACCACACCGATAATTTTAAC   |
| HdrR   | chr16      | 20019740 | T              | C             | GGGACGCGAAGGTGAGCAATGAATC     | TCTGGCAGAGACCCACCAGCTTAC   |
| HdrR   | chr8       | 14657015 | C              | T             | CATGCCTGTGTGCTTGACTATTGCAG    | CCGTTCAAGAAGTCGTTAACTGG    |
| HdrR   | chr13      | 5993620  | T              | A             | CGTTTTTTAAGGAAAACCTTGATGG     | TGGACTGAGTGACCCCTAACCCCTC  |
| HdrR   | chr9       | 11937557 | T              | C             | TCCTAACAGCAAAGGACTCAAAACCC    | GTGACACAGGGCTGTGCATAGAGAG  |
| HdrR   | chr24      | 17741133 | G              | T             | GTCCACCTTTTTCAGAGCTCTTTCTGAC  | TCAGGCCTCTTTGTCACTGCCTGG   |
| HdrR   | chr2       | 15141629 | G              | A             | ATGTCCCCCTAAAATCCCTCTAGGC     | CATTGCTGCAGTCCGGAGTCAAAGG  |
| HdrR   | chr22      | 21202891 | A              | G             | TAGGTGTGAGTGCGGGAGTGAATGG     | TCCAGGTCCAGGTCCAGGTCTATCC  |
| HdrR   | chr12      | 5608651  | A              | G             | CTGCTGCATTTAAACATCTGACTTTCAGG | TACATGCAGGCAAACAATGAAATGTC |
| HdrR   | chr9       | 15611521 | C              | A             | GCATGTGTGACCCTGTCCGTGTAAG     | GCTTATCAACATGCCAATGTCCCC   |

|      |       |          |   |   |                               |                               |
|------|-------|----------|---|---|-------------------------------|-------------------------------|
| HdrR | chr22 | 21589634 | A | G | AAATGCAGGGTTGAACGCTCTAATGC    | TCCAGGATTTCCAGGATTTTTGCCTC    |
| HdrR | chr1  | 21776066 | G | T | GAACCTGATCAGGAAGAAGTTAGGG     | TGCCTGTTCTTTGAAACTGTGCCTC     |
| HdrR | chr1  | 21103193 | A | T | TCCAGCCCGCTCAGATGTTGTAGAC     | GAATGGGGAGTCTGTATCGCCCCTG     |
| HdrR | chr1  | 33292558 | A | C | ACGGGCACGTGACTGGTGTCTATG      | GGATACCGTGTGACGGTGCFTAATAG    |
| HdrR | chr10 | 22338538 | C | A | AACCCCAACAACCCTTTTGGAGTGC     | TGAGGCGACTCAGCCTTACAGCTTG     |
| HdrR | chr1  | 29019329 | G | C | CGCCTTGGTCTGCATCAAGAGTGAC     | TGCGCTCCTAAGCTTTCTCTCAGCG     |
| HdrR | chr1  | 28914573 | C | G | AGCAGGCACTGTGAAGAATACCACG     | ACTTCAAGGCTCACTTTTTGGTGCC     |
| HdrR | chr13 | 21682092 | A | G | TGTTTTACCCTTAAACAATGGTTTGCTGC | ATGGAAATCTGCACAGGTGCAAGCC     |
| HdrR | chr15 | 27757265 | A | C | CATCAAACCTAAGACAACCTCCTGCC    | TGTGACGTTTTTGTGTTTCTGTGAGAACG |
| HdrR | chr20 | 3264988  | C | T | GAGGTGTGAAGTGTGCTGAAGGC       | AGGCAGTTTTATGTTTGAGCGCCCC     |
| HdrR | chr1  | 22961788 | T | A | GCAGCCACTGGTATTTTGTGGGGAC     | CCTGGGGGACGTTCCCTCGATTAG      |
| HdrR | chr6  | 25154795 | C | G | GGGAGCACCACTAGTGATGTCTGAG     | TTATGGTGCAGAAGCACAGAATCGG     |
| HdrR | chr13 | 12608185 | C | G | ACGTTGATTTTGCCTGACGTTTGC      | CTAGTAGGGAGGCTTCGTAAGGTGC     |
| HdrR | chr7  | 17776985 | T | C | ATTTTGGCTGGGGGACCTGAAACAG     | ACAAGAGGCCACTAAAGTCCCACTCC    |
| HdrR | chr18 | 12893252 | A | G | TCCAGCCATAGGTGAAATCTACAAAGC   | GCCAAGCTGTTCAATGGTTTAAGGC     |
| HdrR | chr6  | 7190804  | T | C | GTTTTTGCCTTTTGTGGTGCAGGGC     | AGTCATAAGGGCGTTTCAAAGCTGGC    |
| HdrR | chr1  | 23489939 | C | T | CTTTCCTGTTCTCACTCACAGGCC      | ATCCAGGTGTGCGTATGGCTGTTTC     |
| HdrR | chr21 | 27091378 | T | C | TGGTAGGCTGTTCCAGAGGTCAAAGG    | TGGGTCAAATCTCTCAAGGCGCTC      |
| HdrR | chr16 | 5095846  | A | G | ATGAGTCTTAGTTGCCATGGGCGGG     | ACGGCATAAGCACACACACAGAGAC     |
| HdrR | chr7  | 3668467  | T | C | TGTGTTGACTTTGTCTGTGCTTTGC     | TTCAAGCACACCGTCCCGTTCTGTC     |

**Table S6 Details of sequence coverage for the additional inbred medaka lines.** The table provides percent read alignment for each of the libraries sequenced for each inbred strain. Total coverage of the genome and median read depth is given for the total sequence for all libraries from that strain.

| Strain                                                    | HNI  | HSOK | Kaga  | Nilan |
|-----------------------------------------------------------|------|------|-------|-------|
| <b>Aligned reads by library type (%)</b>                  |      |      |       |       |
| 3kb mate-pair 100bp reads                                 | 50   | 59,7 | 56,2  | 56.2  |
| 54bp reads                                                | 69,3 | 66   | 60,9  | 60.9  |
| 300bp paired-end                                          | 82,5 | 81   | 77,3  | 77.3  |
| 500bp paired-end                                          | 82,4 | 81   | 76,5  | 76.5  |
| <b>Coverage of reference genome (%)</b>                   | 78,4 | 77,8 | 78,4  | 76,9  |
| <b>Median coverage at locations covered at least once</b> | 113  | 108  | 119,0 | 125   |
