# Supplementary material for: Genomic and Phenotypic Characterization of a Wild Medaka Population: Towards the Establishment of an Isogenic Population Genetic Resource in Fish
Source: PubMed Central journal article supplement (PMC3962483; doi:10.1534/g3.113.008722), 2014-01-09
Supplement: supp_g3.113.008722_FigureS1.pdf [file supp_g3.113.008722_FigureS1.pdf]

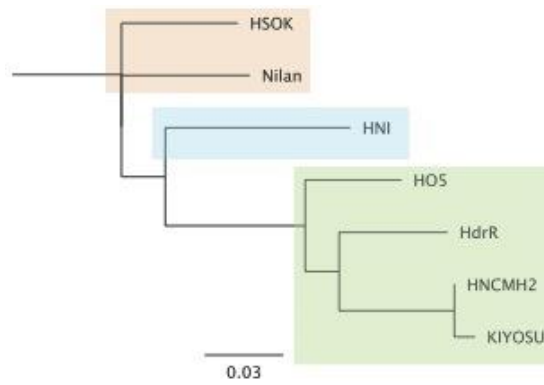

**Figure S1** Boxplots of measured morphometric features in the different inbred strains. A) Dorsal features. B) Lateral features. X-axis: Pixel values for each measurement. Grey shading: Southern inbred strains. Yellow shading: Northern inbred strains.
