# Supplementary material for: Genomic and Phenotypic Characterization of a Wild Medaka Population: Towards the Establishment of an Isogenic Population Genetic Resource in Fish
Source: PubMed Central journal article supplement (PMC3962483; doi:10.1534/g3.113.008722), 2014-01-09
Supplement: supp_g3.113.008722_FigureS2.pdf [file supp_g3.113.008722_FigureS2.pdf]

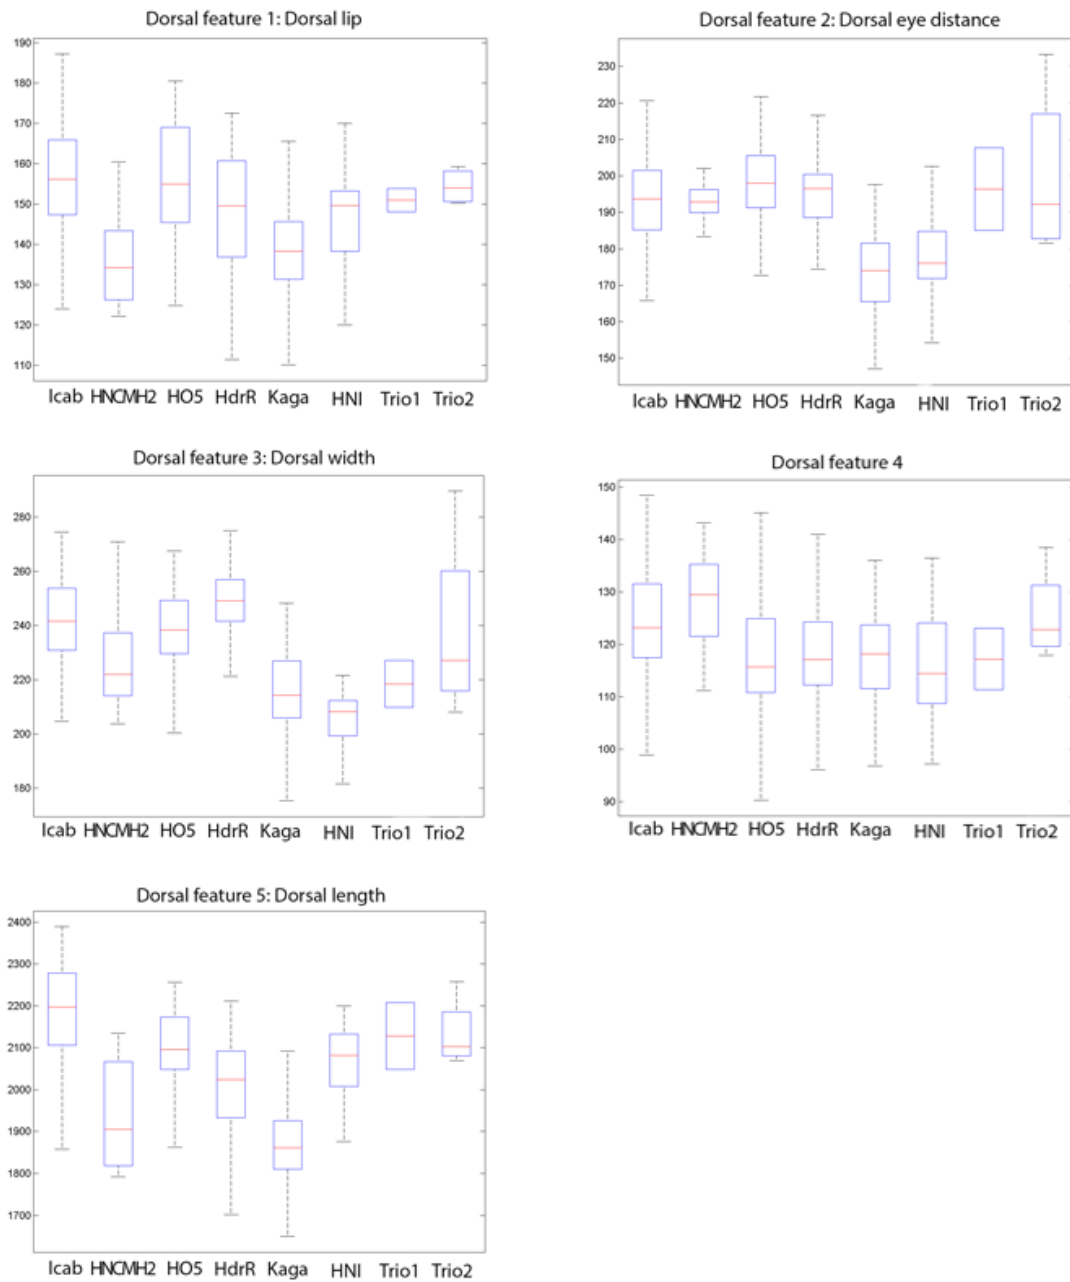

**Figure S2 Morphometric analysis of four inbred Southern lines, two inbred Northern lines and two trios from the Kiyosu wild population: Dorsal features.** The respective definitions of Features 1 to 5 are indicated in Figure 6A. A significant difference in all features between the six inbred lines is observed. The Kiyosu morphometric analysis is preliminary as the dataset has low sample numbers ( $N < 10$ ), whereas for the inbred lines  $N > 75$ . The differences between the Kiyosu datasets to the other datasets are therefore not statistically significant.
