# Supplementary material for: Genomic and Phenotypic Characterization of a Wild Medaka Population: Towards the Establishment of an Isogenic Population Genetic Resource in Fish
Source: PubMed Central journal article supplement (PMC3962483; doi:10.1534/g3.113.008722), 2014-01-09
Supplement: supp_g3.113.008722_TableS1.pdf [file supp_g3.113.008722_TableS1.pdf]

**Table S1 Microsatellite markers used.** Oligonucleotide primer sequences, genomic locations and amplicon lengths for the microsatellite markers analyzed in the Kiyosu population sample.

| Linkage Group | Forward Primer                | Reverse Primer              | Genomic location       | Estimated amplicon size |
|---------------|-------------------------------|-----------------------------|------------------------|-------------------------|
| LG1           | AGCATTCTAGTTGCGTTT            | CTAGTTTTCCGGACAGTCA         | 1:24815630:24815850:1  | 202                     |
| LG2           | ATATCGACAGGTATGGATGG          | TCACATCTAGACCTGGAAGC        | 2:27141500:27141900:1  | 243                     |
| LG3           | TTATGATCCCATATTTGATT          | AGAGGGACACTGGGACAG          | 3:9396729:9397030:1    | 301                     |
| LG4           | GCTTTAAATTAGAGTTCATAACTGC     | GCTTTCATTAACATCAGGAAG       | 4:22460213:22460453:1  | 229                     |
| LG5           | GTTTTTGAAAGTTTTATTTTTGG       | TCAAAGCTAGTATTATGTAACACAG   | 5:8443091:8443291:1    | 181                     |
| LG6           | ATGTCCACCGACAAACAC            | AGTAGATGCCAGTGAGAGA         | 6:10841500:10841800:1  | 250                     |
| LG7           | AGCTTGCCCTTTTCTACAT           | GTTTGGAGACCCACTGTTT         | 7:19386200:19386460:1  | 188                     |
| LG8           | GCCAAAATGCCTTTTATTT           | TCCACATCAGAGCACATTC         | 8:21636852:21637100:1  | 209                     |
| LG9           | TTTTCATCTGCTCCTGATTT          | AGAGTTTCAGCAAGCAATGT        | 9:26192300:26192600:1  | 212                     |
| LG10          | CACCAGCTGAGTTTGAATG           | CAAGAGAAGGGAAGTCGTG         | 10:10113640:10113860:1 | 208                     |
| LG11          | ACAAGTATAGCTGCCCTCAG          | CCTGCTTCTTTTTGATTTT         | 11:4573925:4574200:1   | 205                     |
| LG12          | GCTGTTACAGCTGATGTC            | ATATTGGCACAAGCTGTTTT        | 12:15240800:15241200:1 | 202                     |
| LG13          | TTAGGCTCAATCTGTTATTTACAGATTAC | ATCCACAGGCTCAGCATCTT        | 13:10169674:10169904:1 | 231                     |
| LG14          | TTGCTGTCCTGTGTGTTTG           | GCTTGAAGGCAACAGCTTTG        | 14:7011652:7011851:1   | 200                     |
| LG15          | TGCCATAAATGAGGGAATTTAC        | TCAGTGTGAATCAGTTTCCTGT      | 15:7515398:7515597:1   | 200                     |
| LG16          | AATGACTTGGTGTCATATAATCCA      | AATTAATATCATCTTGGCAACATTATA | 16:7247259:7247458:1   | 200                     |
| LG17          | GGATTGCTGCTGAGTGAATTC         | CAATTTCCAGTTTCACTGACTGG     | 17:8333779:8333969:1   | 191                     |
| LG18          | AGCTTAGCAGACCGTTTTAGG         | CCTGCCGTGGATCTCAG           | 18:5214059:5214245:1   | 187                     |
| LG19          | GGTTTTTGCATCCTGCC             | GCTACCGAGTCCTTGAATAAAG      | 19:13774098:13774297:1 | 200                     |
| LG20          | AAAAGCTGTATGAACAGATTTGC       | TGAGAGCCTGTTGCCTTC          | 20:7665987:7666186:1   | 200                     |
| LG21          | TAGCGGAGGCTGGCTG              | CAGAGCGCGCGGAGC             | 21:10273689:10273888:1 | 200                     |
| LG22          | AGAAAAGGAATGAGCCAGACC         | GTGTTTGTGCTGGAAATAGG        | 22:7909633:7909831:1   | 199                     |
| LG23          | GTGGAGGCTGCCGACGG             | CTCTGCTGTCTGCCTGCC          | 23:8615246:8615443:1   | 198                     |
| LG24          | AGTTTTTGGCTACATTCATAGTCAG     | GGAGAGGGTTTCTAGGGA          | 24:9528803:9529032:1   | 230                     |
