# Supplementary material for: Genomic and Phenotypic Characterization of a Wild Medaka Population: Towards the Establishment of an Isogenic Population Genetic Resource in Fish
Source: PubMed Central journal article supplement (PMC3962483; doi:10.1534/g3.113.008722), 2014-01-09
Supplement: supp_g3.113.008722_TableS3.pdf [file supp_g3.113.008722_TableS3.pdf]

**Table S3 Introgression analysis.** Tests for introgression of the P3 strain into P1 or P2 strains that are more closely related with each other than to P1, using stickleback as the outgroup (O). D% is the introgression test statistic, on which the standard error (SE), 95% confidence intervals (CI) and Z-scores were estimated using block-wise jackknife ([Durand et al. 2011](#)).

| P1           | P2          | P3                                | O           | D%           | SE          | 95% CI     | Z-score     |
|--------------|-------------|-----------------------------------|-------------|--------------|-------------|------------|-------------|
| <b>Kaga</b>  | <b>Hni</b>  | <b>HdrR</b>                       | Stickleback | <b>3.6</b>   | <b>1.3</b>  | <b>2.5</b> | <b>2.77</b> |
| Kaga         | Hni         | Wild Southern                     | "           | 2.6          | 1           | 2          | 2.5         |
| Kaga         | Hni         | Wild Southern<br>(SNPs with HdrR) | "           | -4           | 3.6         | 7.1        | 1.1         |
| <b>Nilan</b> | <b>Hsok</b> | <b>HdrR</b>                       | "           | <b>-12.3</b> | <b>4.66</b> | <b>9.1</b> | <b>2.64</b> |
| Nilan        | Hsok        | Wild Southern                     | "           | -10.4        | 5.27        | 10.3       | 1.96        |
| Nilan        | Hsok        | Wild Southern<br>(SNPs with HdrR) | "           | 7.6          | 6.5         | 12.8       | 0.6         |
| Nilan        | Hsok        | Kaga                              | "           | -0.7         | 2.5         | 4.9        | 0.28        |

Tests for introgression of the P3 strain into P1 or P2 strains that are more closely related with each other than to P1, using stickleback as the outgroup (O). D% is the introgression test statistic, on which the standard error (SE), 95% confidence intervals (CI) and Z-scores were estimated using block-wise jackknife.
