# Supplementary material for: Genomic and Phenotypic Characterization of a Wild Medaka Population: Towards the Establishment of an Isogenic Population Genetic Resource in Fish
Source: PubMed Central journal article supplement (PMC3962483; doi:10.1534/g3.113.008722), 2014-01-09
Supplement: supp_g3.113.008722_TableS4.pdf [file supp_g3.113.008722_TableS4.pdf]

**Table S4 iHS analysis.** Numbers of SNPs showing evidence of recent positive selection in regions with different levels of evolutionary conservation versus those expected at random. Expected values, their standard deviations and p-values were estimated from permutation tests.

| Type                      | Observed | Expected | Standard deviation (+/- ) | Fold change | Direction of difference | P      |
|---------------------------|----------|----------|---------------------------|-------------|-------------------------|--------|
| Non-conserved             | 87       | 60       | 7                         | 1.45        | Enriched                | <0.005 |
| At least 1 other teleost  | 105      | 131      | 7                         | 0.80        | Depleted                | <0.005 |
| At least 2 other teleosts | 95       | 110      | 7                         | 0.86        | "                       | 0.014  |
| At least 3 other teleosts | 72       | 89       | 7                         | 0.81        | "                       | 0.008  |
| Four other teleosts       | 38       | 27       | 5                         | 1.41        | Enriched                | 0.032  |

Numbers of SNPs showing evidence of recent positive selection in regions with different levels of evolutionary conservation versus those expected at random. Expected values, their standard deviations and p-values were estimated from permutation tests.
