# Supplementary material for: Genomic and Phenotypic Characterization of a Wild Medaka Population: Towards the Establishment of an Isogenic Population Genetic Resource in Fish
Source: PubMed Central journal article supplement (PMC3962483; doi:10.1534/g3.113.008722), 2014-01-09
Supplement: supp_g3.113.008722_TableS5.pdf [file supp_g3.113.008722_TableS5.pdf]

**Table S5 Primers designed for SNP verification sequencing.** PCR amplification primers are given for the SNP resequencing amplicons. For the coding SNPs, the original reference sequence indicated a coding triplet, whereas a stop codon was indicated by our height throughput sequencing. The status column indicates whether PCR amplification and sequencing confirmed the new sequence.

**NONSENSE SNPs**

| Strain | Chromosome | Position | Reference triplet | Detected triplet | Reference amino acid | Forward primer                 | Reverse primer                |
|--------|------------|----------|-------------------|------------------|----------------------|--------------------------------|-------------------------------|
| HNI    | chr23      | 20491840 | TTA               | TAA              | L                    | TCAGTGGCTGTAAAAGGCTGTAGATTG    | ACCACACAGATGCGAAAAACACATCC    |
| HNI    | chr8       | 1955292  | CGA               | TGA              | R                    | ACCAGAATCCTTCTCCTCCACCTGC      | CAAGCTGTGTAAGTGGGCTGAGTC      |
| HNI    | chr7       | 1468063  | TGG               | TAG              | W                    | AGTGTCCCATTTTGCCTTCAACAGC      | CGGTTGCTTCTGCAAAGCCTATTCTCC   |
| HNI    | chr18      | 2964751  | AAG               | TAG              | K                    | CTTTGCGTAGAATCTGATGGGACAGC     | TGTATGCCTGCCTTTTCAATCAGCG     |
| HNI    | chr2       | 20573966 | CAG               | TAG              | Q                    | CCGAGGTAAATTCTTTTCTGGTCAGTGG   | GGGTTGTTTGTGCTTGGCTTCCCTG     |
| HNI    | chr14      | 15525786 | TAC               | TAA              | Y                    | ACAACGACGTGAATATTCTGGAGGGG     | AAGTCGCTTTTACTGCGCACCTGG      |
| Kaga   | chr3       | 2245314  | TCA               | TGA              | S                    | TCTTGCACTGGGGGAGGTGATGG        | AGTTCCTCGTCTGCAATTGGTTGGC     |
| Kaga   | chr5       | 14257733 | CAA               | TAA              | Q                    | TCAATTATTATCGTGGGATGTAAGTGGTGC | TGTGGATGGATGGAACAAGCTCAACG    |
| Kaga   | chr14      | 7969562  | CAA               | TAA              | Q                    | AGCTCAAGGTGGTGTAGGTTCCAGG      | CTCGTGGGTCTCCCGTTCTCTCATC     |
| Kaga   | chr13      | 5610005  | TCG               | TAG              | S                    | CGCCAGATCAAAGATAGGGGGAAAGC     | TATGACGTTCACTGGAGAAGGGGC      |
| Nilan  | chr8       | 22537356 | CGA               | TGA              | R                    | CCACAGAGCCACAGGAGATGTGATG      | AGAATCCTAAAAGCAGCAGACGCCG     |
| Nilan  | chr22      | 1757977  | GGA               | TGA              | G                    | TCGTTTCTGCAGATCCTGAGGTGG       | GGGTCAGGGTTTTAGCCGTTTCTGC     |
| Nilan  | chr16      | 6784490  | TGT               | TGA              | C                    | TCACTTTTGCCTCTGTCTTTAGGTGG     | TGCTGACAGCTTAAACAAGGATCTGTTTG |
| Nilan  | chr7       | 4911752  | TGG               | TAG              | W                    | TCTGCTGTACGCAGCGGACTTTTTTC     | AACTTTAAGCTTTTCTGGCGCAGC      |
| Nilan  | chr18      | 17668284 | AAA               | TAA              | K                    | ACACACCTTTCTTGACTTCAGCCGC      | AACGAGAAGACAGAAGACGGTGAGGC    |
| Nilan  | chr15      | 11785459 | GAG               | TAG              | E                    | ACATTTCTGACTAATTTACAGCAGGTC    | CGTAGTTGGACTTTATGGAAGCCAGG    |

**NON-CODING SNPs (Kaga)**

| Strain | Chromosome | Position | Reference base | Detected base | Forward primer               | Reverse primer             |
|--------|------------|----------|----------------|---------------|------------------------------|----------------------------|
| Kaga   | chr3       | 8401434  | T              | G             | AGGTTTGTACCAGTGATTGTGACTGAG  | GGTGCATTATGTAGCTGCTGTTCCG  |
| Kaga   | chr4       | 31533375 | G              | T             | AGCAGCCAGTGCCAAGAAAACAGAG    | TTTCAATGGCCCTTTAGGGGCTCCG  |
| Kaga   | chr6       | 15965403 | G              | C             | TGCACGATGTTGCCAAAATATTACCCCC | CGTCTTGGTCACAGCGAACTCTAACG |

|      |       |          |   |   |                             |                           |
|------|-------|----------|---|---|-----------------------------|---------------------------|
| Kaga | chr7  | 27519929 | G | A | TGCACTCTGCCATAAACAGTCATCC   | TGTCTGTCTGGAAGCAGCATAACCC |
| Kaga | chr19 | 19825516 | A | T | CCTGCACAAAACCCACACATACACG   | AGGCAGAGTTTGACGTGGATCAAGC |
| Kaga | chr22 | 5161675  | G | A | GACCTTTAACTGGGGCCCTGTGTG    | TCTCCTCCCCCTTTGTTGTGTGCTG |
| Kaga | chr20 | 9670880  | A | T | GCAAGCTGCCCTAACCAATGATCCG   | CTCACATGCCTAGCAGCAGTGACAG |
| Kaga | chr22 | 24304734 | T | C | TGGGGTTCTAGTGAAGGAAGGCTTGG  | GCCTCTTTAGCCGTCCTCCTGTTG  |
| Kaga | chr5  | 28448196 | A | T | CTGATGTGACACACTCCAAAAACAGGC | ACGAGCCTGTTGGGAGTCAAAAAGC |
| Kaga | chr17 | 2618509  | C | G | GCTGCTTCTAAGGTCAGTCCGTTTG   | GACAACATAAAGCAGCAAGCGCAGC |

#### RANDOM SNPs (HdrR)

| Strain | Chromosome | Position | Reference base | Detected base | Forward primer                | Reverse primer               |
|--------|------------|----------|----------------|---------------|-------------------------------|------------------------------|
| HdrR   | chr1       | 16324653 | C              | A             | CAAGGGAGGCCACCAATGAACCTGAG    | TTTTGATGTGGAGGAACAGTAGGCTG   |
| HdrR   | chr1       | 33512684 | T              | G             | TGTTTGTGCAGAGCGAAGCAGCAG      | GACCGTGAATGTAAGGGAGCCCG      |
| HdrR   | chr9       | 31027771 | T              | G             | GCACCAGGCTTGCCACAGTTAAGG      | AAGACATCCGTGTCCGTTCCAGTGC    |
| HdrR   | chr16      | 3550201  | C              | A             | AGCCGACGTGGCCTTTGTGTGGG       | TCTTCTGGTGGTTTCTACCTCTGGG    |
| HdrR   | chr1       | 27318612 | A              | G             | CAAGCAGGTTTTGCTTTCAACTCCGC    | ACCTGCCAAAAGTGAAACCTAACGGC   |
| HdrR   | chr16      | 5495844  | A              | G             | GCAACCATGGCAGTTGACCATAAAC     | TGAGCGCTCTTCTCTCATCCATGC     |
| HdrR   | chr1       | 23401471 | C              | T             | CCGATACGCTGGTTTCTACGGTCTG     | TGTCTGTGTTGAACTGTGTCTCCAGC   |
| HdrR   | chr1       | 15819568 | A              | G             | AAAGAGTCAGATGGAAGAGCTGAAAGATG | TGATTGCGTGTACTCCTCCTCCAAG    |
| HdrR   | chr1       | 19723612 | C              | T             | ACATGGTACTCACACGCTCATTGGC     | CACAGAAGTACCGCTGAAGGTGCTG    |
| HdrR   | chr22      | 21769957 | T              | C             | GTGAGAGCGCTGGAGATGAGAGGAG     | CTGGAAAACACATTTACGCTGCGG     |
| HdrR   | chr8       | 2893859  | A              | G             | ACAAGTTGGGCATATCCACAGGACG     | GTTTACCACACCGATAATTTTAAC     |
| HdrR   | chr16      | 20019740 | T              | C             | GGGACGCGAAGGTGAGCAATGAATC     | TCTGGCAGAGACCCACCAGCTTAC     |
| HdrR   | chr8       | 14657015 | C              | T             | CATGCCTGTGTGCTTGACTATTGCAG    | CCGTTCAAGAAGTCGTTAACTGG      |
| HdrR   | chr13      | 5993620  | T              | A             | CGTTTTTTAAGGAAAACCTTGATGG     | TGGACTGAGTGACCCCTAACCCCTC    |
| HdrR   | chr9       | 11937557 | T              | C             | TCCTAACAGCAAAGGACTCAAAACCC    | GTGACACAGGGCTGTGCATAGAGAG    |
| HdrR   | chr24      | 17741133 | G              | T             | GTCCACCTTTTTCAGAGCTCTTTCTGAC  | TCAGGCCTTCTTTGCTACTGCCTGG    |
| HdrR   | chr2       | 15141629 | G              | A             | ATGTCCCCCTAAAATCCCTCTAGGC     | CATTGCTGCAGTCCGGAGTCAAAGG    |
| HdrR   | chr22      | 21202891 | A              | G             | TAGGTGTGAGTGCGGGAGTGAATGG     | TCCAGGTCCAGGTCCAGGTCTATCC    |
| HdrR   | chr12      | 5608651  | A              | G             | CTGCTGCATTTAAACATCTGACTTTCAGG | TACATGCAGGCAAACACAATGAAATGTC |
| HdrR   | chr9       | 15611521 | C              | A             | GCATGTGTGACCCTGTCCGTGTAAG     | GCTTATCAACATGCCAATGTCCCC     |

|      |       |          |   |   |                               |                               |
|------|-------|----------|---|---|-------------------------------|-------------------------------|
| HdrR | chr22 | 21589634 | A | G | AAATGCAGGGTTGAACGCTCTAATGC    | TCCAGGATTTCCAGGATTTTTGCCTC    |
| HdrR | chr1  | 21776066 | G | T | GAACCTGATCAGGAAGAAGTTAGGG     | TGCCTGTTCTTTGAAACTGTGCCTC     |
| HdrR | chr1  | 21103193 | A | T | TCCAGCCCGCTCAGATGTTGTAGAC     | GAATGGGGAGTCTGTATCGCCCCTG     |
| HdrR | chr1  | 33292558 | A | C | ACGGGCACGTGACTGGTGTCTATG      | GGATACCGTGTGACGGTGCFTAATAG    |
| HdrR | chr10 | 22338538 | C | A | AACCCCAACAACCCTTTTGGAGTGC     | TGAGGCGACTCAGCCTTACAGCTTG     |
| HdrR | chr1  | 29019329 | G | C | CGCCTTGGTCTGCATCAAGAGTGAC     | TGCGCTCCTAAGCTTTCTCTCAGCG     |
| HdrR | chr1  | 28914573 | C | G | AGCAGGCACTGTGAAGAATACCACG     | ACTTCAAGGCTCACTTTTTGGTGCC     |
| HdrR | chr13 | 21682092 | A | G | TGTTTTACCCTTAAACAATGGTTTGCTGC | ATGGAAATCTGCACAGGTGCAAGCC     |
| HdrR | chr15 | 27757265 | A | C | CATCAAACCTAAGACAACCTCCTGCC    | TGTGACGTTTTTGTGTTTCTGTGAGAACG |
| HdrR | chr20 | 3264988  | C | T | GAGGTGTGAAGTGTGCTGAAGGC       | AGGCAGTTTTATGTTTGAGCGCCCC     |
| HdrR | chr1  | 22961788 | T | A | GCAGCCACTGGTATTTTGTGGGGAC     | CCTGGGGGACGTTCCCTCGATTAG      |
| HdrR | chr6  | 25154795 | C | G | GGGAGCACCACCTAGTGATGTCTGAG    | TTATGGTGCAGAAGCACAGAATCGG     |
| HdrR | chr13 | 12608185 | C | G | ACGTTGATTTTGCCTGACGTTTGC      | CTAGTAGGGAGGCTTCGTAAGGTGC     |
| HdrR | chr7  | 17776985 | T | C | ATTTTGGCTGGGGGACCTGAAACAG     | ACAAGAGGCCACTAAAGTCCCACTCC    |
| HdrR | chr18 | 12893252 | A | G | TCCAGCCATAGGTGAAATCTACAAAGC   | GCCAAGCTGTTCAATGGTTTAAGGC     |
| HdrR | chr6  | 7190804  | T | C | GTTTTTGCCTTTTGTGGTGCAGGGC     | AGTCATAAGGGCGTTTCAAAGCTGGC    |
| HdrR | chr1  | 23489939 | C | T | CTTTCCTGTTCTCACTCACAGGCC      | ATCCAGGTGTGCGTATGGCTGTTTC     |
| HdrR | chr21 | 27091378 | T | C | TGGTAGGCTGTTCCAGAGGTCAAAGG    | TGGGTCAAATCTCTCAAGGCGCTC      |
| HdrR | chr16 | 5095846  | A | G | ATGAGTCTTAGTTGCCATGGGCGGG     | ACGGCATAAGCACACACACAGAGAC     |
| HdrR | chr7  | 3668467  | T | C | TGTGTTGACTTTGTCTGTGCTTTGC     | TTCAAGCACACCGTCCCGTTCTGTC     |
